# Supplementary material
Source: MDPI journal article supplement (https://www.mdpi.com/1999-4907/13/10/1537)
Supplement: s1 [file s1]

**Table S1.** Genotypes of *Aesculus glabra* samples used in this study. Numbers indicate alleles sizes in base pairs. 0 indicates missing genotypes. Highlight indicates nonmaternal alleles in National Champion seedlings.

| Sample        | Description                   | AT6D8      |            | AT7D1      |            | AT6D12     |            | AT5D10     |            | AT7D8      |            | AT6D17     |            |
|---------------|-------------------------------|------------|------------|------------|------------|------------|------------|------------|------------|------------|------------|------------|------------|
|               |                               | Allele 1   | Allele 2   |
| <b>HY 000</b> | <b>National Champion (NC)</b> | <b>170</b> | <b>172</b> | <b>200</b> | <b>210</b> | <b>152</b> | <b>164</b> | <b>252</b> | <b>264</b> | <b>115</b> | <b>121</b> | <b>168</b> | <b>168</b> |
| 16-HY 001     | 2016 Seedling NC              | 170        | 172        | 210        | 210        | 152        | 164        | 252        | 264        | 115        | 115        | 168        | 168        |
| 16-HY 002     | 2016 Seedling NC              | 170        | 170        | 210        | 210        | 152        | 164        | 252        | 264        | 115        | 121        | 168        | 168        |
| 16-HY 003     | 2016 Seedling NC              | 172        | 172        | 210        | 210        | 152        | 164        | 252        | 264        | 121        | 121        | 168        | 168        |
| 16-HY 004     | 2016 Seedling NC              | 170        | 172        | 210        | 210        | 164        | 164        | 264        | 264        | 115        | 121        | 168        | 168        |
| 16-HY 005     | 2016 Seedling NC              | 170        | 172        | 200        | 200        | 152        | 164        | 252        | 264        | 115        | 115        | 168        | 168        |
| 16-HY 006     | 2016 Seedling NC              | 172        | 172        | 200        | 210        | 152        | 152        | 252        | 252        | 115        | 121        | 168        | 168        |
| 16-HY 007     | 2016 Seedling NC              | 170        | 170        | 200        | 210        | 152        | 164        | 252        | 264        | 115        | 121        | 168        | 168        |
| 16-HY 008     | 2016 Seedling NC              | 170        | 170        | 200        | 200        | 164        | 164        | 264        | 264        | 115        | 121        | 168        | 168        |
| 16-HY 009     | 2016 Seedling NC              | 170        | 170        | 200        | 210        | 152        | 152        | 252        | 252        | 115        | 115        | 168        | 168        |
| 16-HY 010     | 2016 Seedling NC              | 170        | 172        | 200        | 200        | 152        | 152        | 252        | 252        | 121        | 121        | 168        | 168        |
| 16-HY 011     | 2016 Seedling NC              | 170        | 170        | 210        | 210        | 152        | 164        | 252        | 264        | 115        | 121        | 168        | 168        |
| 16-HY 012     | 2016 Seedling NC              | 170        | 170        | 200        | 210        | 152        | 164        | 252        | 264        | 115        | 121        | 168        | 168        |
| 16-HY 013     | 2016 Seedling NC              | 170        | 172        | 210        | 210        | 152        | 152        | 252        | 252        | 121        | 121        | 168        | 168        |
| 16-HY 014     | 2016 Seedling NC              | 170        | 172        | 200        | 210        | 164        | 164        | 264        | 264        | 115        | 121        | 168        | 168        |
| 16-HY 015     | 2016 Seedling NC              | 170        | 172        | 200        | 200        | 164        | 164        | 264        | 264        | 115        | 115        | 168        | 168        |
| 16-HY 016     | 2016 Seedling NC              | 172        | 172        | 210        | 210        | 164        | 164        | 264        | 264        | 115        | 121        | 168        | 168        |
| 16-HY 017     | 2016 Seedling NC              | 170        | 170        | 210        | 210        | 152        | 164        | 252        | 264        | 121        | 121        | 168        | 168        |
| 16-HY 018     | 2016 Seedling NC              | 172        | 170        | 200        | 210        | 152        | 164        | 252        | 264        | 115        | 115        | 168        | 168        |
| 16-HY 019     | 2016 Seedling NC              | 172        | 172        | 200        | 210        | 152        | 164        | 252        | 264        | 115        | 121        | 168        | 168        |
| 16-HY 020     | 2016 Seedling NC              | 170        | 172        | 210        | 210        | 152        | 164        | 252        | 264        | 115        | 121        | 168        | 168        |
| 16-HY 021     | 2016 Seedling NC              | 170        | 172        | 210        | 210        | 152        | 164        | 252        | 264        | 121        | 121        | 168        | 168        |
| 16-HY 022     | 2016 Seedling NC              | 172        | 172        | 200        | 210        | 164        | 164        | 264        | 264        | 115        | 121        | 168        | 168        |
| 16-HY 023     | 2016 Seedling NC              | 160        | 172        | 210        | 210        | 164        | 168        | 264        | 268        | 115        | 129        | 168        | 168        |
| 16-HY 024     | 2016 Seedling NC              | 170        | 172        | 200        | 200        | 152        | 164        | 252        | 264        | 115        | 121        | 168        | 168        |

|               |                                  |            |            |            |            |            |            |            |            |            |            |            |            |
|---------------|----------------------------------|------------|------------|------------|------------|------------|------------|------------|------------|------------|------------|------------|------------|
| 18-HY 002     | 2018 Seedling NC                 | 172        | 172        | 0          | 0          | 0          | 0          | 252        | 264        | 121        | 121        | 168        | 168        |
| 18-HY 003     | 2018 Seedling NC                 | 0          | 0          | 0          | 0          | 152        | 164        | 252        | 264        | 115        | 121        | 168        | 168        |
| 18-HY 004     | 2018 Seedling NC                 | 170        | 172        | 0          | 0          | 152        | 152        | 252        | 252        | 115        | 121        | 168        | 168        |
| 18-HY 005     | 2018 Seedling NC                 | 170        | 172        | 0          | 0          | 152        | 152        | 252        | 252        | 115        | 121        | 168        | 168        |
| 18-HY 006     | 2018 Seedling NC                 | 170        | 172        | 0          | 0          | 0          | 0          | 252        | 264        | 121        | 121        | 168        | 168        |
| 18-HY 007     | 2018 Seedling NC                 | 170        | 172        | 0          | 0          | 152        | 164        | 252        | 264        | 121        | 121        | 168        | 168        |
| 18-HY 008     | 2018 Seedling NC                 | 170        | 172        | 0          | 0          | 0          | 0          | 264        | 264        | 115        | 121        | 168        | 168        |
| 18-HY 011     | 2018 Seedling NC                 | 170        | 172        | 0          | 0          | 152        | 164        | 252        | 264        | 121        | 121        | 168        | 168        |
| 18-HY 012     | 2018 Seedling NC                 | 170        | 170        | 0          | 0          | 152        | 152        | 252        | 252        | 121        | 121        | 168        | 168        |
| 18-HY 013     | 2018 Seedling NC                 | 172        | 172        | 200        | 200        | 152        | 164        | 252        | 264        | 115        | 115        | 168        | 168        |
| 18-HY 014     | 2018 Seedling NC                 | 172        | 172        | 200        | 200        | 164        | 164        | 264        | 264        | 115        | 121        | 168        | 168        |
| 18-HY 015     | 2018 Seedling NC                 | 170        | 172        | 200        | 200        | 152        | 164        | 252        | 264        | 115        | 121        | 168        | 168        |
| 18-HY 016     | 2018 Seedling NC                 | 160        | 172        | 200        | 210        | 156        | 164        | 256        | 264        | 115        | 129        | 168        | 168        |
| 18-HY 017     | 2018 Seedling NC                 | 170        | 172        | 0          | 0          | 0          | 0          | 252        | 264        | 115        | 115        | 168        | 168        |
| 18-HY 018     | 2018 Seedling NC                 | 170        | 172        | 0          | 0          | 0          | 0          | 252        | 264        | 115        | 121        | 168        | 168        |
| 18-HY 019     | 2018 Seedling NC                 | 172        | 172        | 0          | 0          | 152        | 152        | 252        | 252        | 115        | 115        | 168        | 168        |
| 18-HY 020     | 2018 Seedling NC                 | 170        | 172        | 0          | 0          | 152        | 164        | 252        | 264        | 115        | 121        | 168        | 168        |
| 18-HY 021     | 2018 Seedling NC                 | 170        | 172        | 0          | 0          | 152        | 164        | 252        | 264        | 115        | 121        | 168        | 168        |
| 18-HY 022     | 2018 Seedling NC                 | 170        | 172        | 0          | 0          | 0          | 0          | 264        | 264        | 115        | 115        | 168        | 168        |
| 18-HY 025     | 2018 Seedling NC                 | 170        | 170        | 0          | 0          | 164        | 164        | 264        | 264        | 0          | 0          | 168        | 168        |
| <b>JG 000</b> | <b>Ohio State Champion (OSC)</b> | <b>165</b> | <b>174</b> | <b>208</b> | <b>210</b> | <b>154</b> | <b>156</b> | <b>254</b> | <b>256</b> | <b>115</b> | <b>115</b> | <b>168</b> | <b>172</b> |
| 18-JG 001     | 2018 Seedling OSC                | 174        | 178        | 204        | 208        | 154        | 174        | 254        | 274        | 115        | 135        | 168        | 168        |
| 18-JG 002     | 2018 Seedling OSC                | 174        | 180        | 208        | 210        | 154        | 156        | 254        | 256        | 115        | 115        | 168        | 172        |
| 18-JG 003     | 2018 Seedling OSC                | 164        | 165        | 208        | 208        | 152        | 156        | 252        | 256        | 115        | 135        | 168        | 168        |
| 18-JG 004     | 2018 Seedling OSC                | 165        | 170        | 208        | 208        | 156        | 166        | 256        | 266        | 115        | 115        | 168        | 168        |
| 18-JG 005     | 2018 Seedling OSC                | 160        | 174        | 210        | 210        | 152        | 154        | 252        | 254        | 115        | 137        | 168        | 168        |
| 18-JG 006     | 2018 Seedling OSC                | 165        | 168        | 0          | 0          | 0          | 0          | 252        | 256        | 115        | 115        | 168        | 172        |
| 18-JG 007     | 2018 Seedling OSC                | 174        | 174        | 210        | 212        | 154        | 158        | 254        | 258        | 115        | 125        | 168        | 172        |
| 18-JG 008     | 2018 Seedling OSC                | 170        | 174        | 208        | 210        | 154        | 162        | 254        | 262        | 115        | 137        | 168        | 172        |
| 18-JG 009     | 2018 Seedling OSC                | 165        | 193        | 210        | 212        | 156        | 156        | 256        | 256        | 115        | 119        | 168        | 168        |
| 18-JG 010     | 2018 Seedling OSC                | 165        | 170        | 203        | 210        | 156        | 158        | 256        | 258        | 113        | 115        | 168        | 172        |

|           |                   |     |     |     |     |     |     |     |     |     |     |     |     |
|-----------|-------------------|-----|-----|-----|-----|-----|-----|-----|-----|-----|-----|-----|-----|
| 18-JG 011 | 2018 Seedling OSC | 165 | 172 | 210 | 212 | 156 | 172 | 256 | 272 | 115 | 149 | 168 | 172 |
| 18-JG 012 | 2018 Seedling OSC | 170 | 174 | 210 | 210 | 152 | 156 | 252 | 256 | 113 | 115 | 168 | 168 |
| 18-JG 013 | 2018 Seedling OSC | 162 | 174 | 203 | 210 | 152 | 156 | 252 | 256 | 115 | 135 | 168 | 172 |
| 18-JG 014 | 2018 Seedling OSC | 164 | 165 | 208 | 212 | 152 | 154 | 252 | 254 | 115 | 115 | 172 | 172 |
| 18-JG 015 | 2018 Seedling OSC | 165 | 168 | 208 | 210 | 154 | 156 | 254 | 256 | 115 | 135 | 168 | 168 |
| 18-JG 016 | 2018 Seedling OSC | 174 | 178 | 210 | 216 | 152 | 156 | 252 | 256 | 115 | 115 | 168 | 168 |
| 18-JG 017 | 2018 Seedling OSC | 165 | 168 | 204 | 208 | 154 | 164 | 254 | 264 | 113 | 115 | 168 | 168 |
| 18-JG 018 | 2018 Seedling OSC | 168 | 174 | 208 | 208 | 156 | 170 | 256 | 270 | 115 | 119 | 168 | 172 |
| 18-JG 019 | 2018 Seedling OSC | 170 | 174 | 208 | 210 | 152 | 154 | 252 | 254 | 113 | 115 | 168 | 168 |
| 18-JG 020 | 2018 Seedling OSC | 162 | 174 | 208 | 208 | 154 | 158 | 254 | 258 | 115 | 131 | 168 | 168 |
| 18-JG 021 | 2018 Seedling OSC | 174 | 174 | 208 | 210 | 154 | 158 | 254 | 258 | 115 | 147 | 172 | 172 |
| 18-JG 022 | 2018 Seedling OSC | 165 | 170 | 208 | 210 | 152 | 154 | 252 | 254 | 113 | 115 | 168 | 168 |
| 18-JG 023 | 2018 Seedling OSC | 164 | 165 | 208 | 212 | 152 | 154 | 252 | 254 | 115 | 135 | 168 | 172 |
| 18-JG 024 | 2018 Seedling OSC | 165 | 178 | 208 | 210 | 156 | 156 | 256 | 256 | 115 | 115 | 168 | 172 |
| 18-JG 025 | 2018 Seedling OSC | 165 | 180 | 208 | 212 | 154 | 156 | 254 | 256 | 115 | 135 | 168 | 168 |
| 18-JG 026 | 2018 Seedling OSC | 164 | 165 | 208 | 212 | 152 | 156 | 252 | 256 | 115 | 115 | 168 | 172 |
| 18-JG 027 | 2018 Seedling OSC | 165 | 172 | 210 | 212 | 156 | 172 | 256 | 272 | 115 | 131 | 168 | 168 |
| 18-JG 028 | 2018 Seedling OSC | 166 | 174 | 208 | 216 | 156 | 156 | 256 | 256 | 115 | 137 | 168 | 172 |
| 16-JG 103 | 2016 Seedling OSC | 165 | 170 | 210 | 216 | 154 | 154 | 254 | 254 | 115 | 135 | 168 | 172 |
| 16-JG 106 | 2017 Seedling OSC | 162 | 165 | 210 | 210 | 156 | 172 | 256 | 272 | 115 | 115 | 168 | 172 |
| 16-JG 107 | 2018 Seedling OSC | 165 | 178 | 208 | 210 | 154 | 156 | 254 | 256 | 115 | 125 | 168 | 172 |
| 16-JG 108 | 2019 Seedling OSC | 162 | 174 | 210 | 212 | 152 | 154 | 252 | 254 | 115 | 121 | 168 | 172 |
| 16-JG 109 | 2020 Seedling OSC | 165 | 168 | 210 | 212 | 154 | 156 | 254 | 256 | 115 | 135 | 168 | 168 |
| 16-JG 110 | 2021 Seedling OSC | 174 | 176 | 210 | 212 | 156 | 158 | 256 | 258 | 115 | 125 | 168 | 172 |
| 16-JG 111 | 2022 Seedling OSC | 165 | 182 | 210 | 220 | 152 | 154 | 252 | 254 | 115 | 125 | 168 | 172 |
| 16-JG 112 | 2023 Seedling OSC | 165 | 182 | 210 | 220 | 152 | 154 | 252 | 254 | 115 | 125 | 168 | 172 |
| 16-JG 113 | 2024 Seedling OSC | 165 | 168 | 208 | 210 | 156 | 156 | 256 | 256 | 115 | 117 | 168 | 168 |
| 16-JG 114 | 2025 Seedling OSC | 170 | 174 | 210 | 212 | 154 | 162 | 254 | 262 | 113 | 115 | 168 | 168 |
| 16-JG 115 | 2026 Seedling OSC | 165 | 182 | 210 | 220 | 154 | 172 | 254 | 272 | 113 | 115 | 168 | 172 |
| 16-JG 116 | 2027 Seedling OSC | 168 | 174 | 208 | 210 | 152 | 154 | 252 | 254 | 115 | 115 | 168 | 172 |
| 16-JG 117 | 2028 Seedling OSC | 158 | 165 | 208 | 212 | 156 | 164 | 256 | 264 | 115 | 122 | 170 | 172 |

|           |                   |     |     |     |     |     |     |     |     |     |     |     |     |
|-----------|-------------------|-----|-----|-----|-----|-----|-----|-----|-----|-----|-----|-----|-----|
| 16-JG 119 | 2029 Seedling OSC | 168 | 174 | 208 | 210 | 154 | 156 | 254 | 256 | 115 | 117 | 168 | 172 |
| 16-JG 120 | 2030 Seedling OSC | 168 | 174 | 204 | 208 | 154 | 164 | 254 | 264 | 115 | 131 | 168 | 172 |
| 16-JG 121 | 2031 Seedling OSC | 165 | 178 | 208 | 212 | 156 | 160 | 256 | 260 | 115 | 137 | 168 | 172 |
| 16-JG 122 | 2032 Seedling OSC | 170 | 174 | 208 | 208 | 154 | 160 | 254 | 260 | 115 | 135 | 168 | 172 |
| 16-JG 123 | 2033 Seedling OSC | 158 | 174 | 208 | 212 | 154 | 154 | 254 | 254 | 115 | 115 | 168 | 168 |
| 16-JG 124 | 2034 Seedling OSC | 165 | 174 | 208 | 210 | 152 | 156 | 252 | 256 | 115 | 149 | 168 | 172 |
| 16-JG 125 | 2035 Seedling OSC | 166 | 174 | 210 | 210 | 154 | 162 | 254 | 262 | 115 | 135 | 168 | 172 |
| B 030     | Warren Co., OH    | 160 | 170 | 212 | 220 | 162 | 172 | 262 | 272 | 113 | 115 | 168 | 168 |
| B 031     | Warren Co., OH    | 160 | 174 | 212 | 220 | 172 | 172 | 256 | 272 | 119 | 149 | 168 | 168 |
| B 032     | Warren Co., OH    | 164 | 170 | 212 | 212 | 152 | 152 | 252 | 256 | 107 | 119 | 168 | 168 |
| B 033     | Warren Co., OH    | 170 | 185 | 200 | 200 | 152 | 156 | 252 | 256 | 107 | 117 | 168 | 172 |
| B 035     | Warren Co., OH    | 165 | 170 | 208 | 208 | 172 | 180 | 272 | 280 | 115 | 115 | 168 | 168 |
| B 036     | Warren Co., OH    | 166 | 170 | 210 | 210 | 154 | 162 | 254 | 262 | 113 | 129 | 168 | 168 |
| B 040     | Summit Co., OH    | 174 | 180 | 200 | 210 | 154 | 180 | 254 | 280 | 115 | 135 | 168 | 172 |
| B 041     | Summit Co., OH    | 166 | 168 | 208 | 208 | 152 | 180 | 252 | 280 | 135 | 135 | 168 | 172 |
| B 042     | Summit Co., OH    | 166 | 168 | 210 | 212 | 152 | 180 | 252 | 280 | 133 | 135 | 168 | 172 |
| B 043     | Summit Co., OH    | 166 | 168 | 210 | 210 | 152 | 152 | 252 | 252 | 113 | 117 | 168 | 170 |
| B 044     | Summit Co., OH    | 168 | 168 | 210 | 212 | 152 | 152 | 252 | 252 | 113 | 119 | 168 | 168 |
| B 045     | Summit Co., OH    | 168 | 174 | 208 | 212 | 164 | 164 | 252 | 264 | 113 | 115 | 168 | 168 |
| B 046     | Summit Co., OH    | 160 | 170 | 212 | 212 | 160 | 176 | 260 | 276 | 115 | 119 | 168 | 168 |
| B 047     | Summit Co., OH    | 160 | 166 | 210 | 212 | 156 | 160 | 256 | 260 | 111 | 119 | 168 | 168 |
| B 048     | Summit Co., OH    | 166 | 170 | 208 | 208 | 156 | 158 | 256 | 258 | 115 | 115 | 168 | 168 |
| B 049     | Summit Co., OH    | 164 | 178 | 0   | 0   | 152 | 172 | 252 | 272 | 115 | 133 | 168 | 168 |
| B 050     | Summit Co., OH    | 174 | 174 | 200 | 210 | 166 | 166 | 256 | 266 | 115 | 133 | 168 | 168 |
| B 051     | Summit Co., OH    | 160 | 168 | 208 | 212 | 156 | 172 | 256 | 272 | 115 | 117 | 168 | 168 |
| B 052     | Summit Co., OH    | 164 | 174 | 208 | 210 | 154 | 156 | 254 | 256 | 115 | 117 | 168 | 168 |
| B 053     | Summit Co., OH    | 166 | 174 | 212 | 220 | 156 | 172 | 256 | 272 | 113 | 119 | 168 | 168 |
| B 060     | Summit Co., OH    | 166 | 168 | 212 | 220 | 164 | 164 | 264 | 264 | 113 | 117 | 168 | 168 |
| B 061     | Summit Co., OH    | 166 | 170 | 208 | 212 | 152 | 166 | 252 | 266 | 117 | 117 | 168 | 168 |
| B 062     | Summit Co., OH    | 164 | 166 | 214 | 220 | 156 | 156 | 256 | 256 | 113 | 113 | 168 | 170 |
| B 063     | Summit Co., OH    | 164 | 166 | 208 | 214 | 156 | 156 | 256 | 256 | 113 | 113 | 168 | 168 |

|       |                |     |     |     |     |     |     |     |     |     |     |     |     |
|-------|----------------|-----|-----|-----|-----|-----|-----|-----|-----|-----|-----|-----|-----|
| B 064 | Summit Co., OH | 160 | 168 | 208 | 210 | 156 | 156 | 256 | 256 | 113 | 133 | 168 | 168 |
| B 065 | Summit Co., OH | 160 | 166 | 208 | 212 | 156 | 156 | 256 | 256 | 113 | 113 | 168 | 168 |
| B 066 | Summit Co., OH | 166 | 168 | 212 | 212 | 152 | 160 | 252 | 260 | 113 | 115 | 168 | 168 |
| B 067 | Summit Co., OH | 162 | 168 | 208 | 208 | 164 | 176 | 264 | 276 | 117 | 135 | 168 | 176 |
| B 068 | Summit Co., OH | 160 | 168 | 208 | 212 | 156 | 156 | 256 | 256 | 113 | 115 | 168 | 168 |
| B 069 | Summit Co., OH | 168 | 185 | 210 | 210 | 152 | 176 | 252 | 276 | 115 | 117 | 168 | 176 |
| B 070 | DuPage Co., IL | 164 | 166 | 210 | 210 | 172 | 176 | 272 | 276 | 127 | 127 | 168 | 170 |
| B 071 | DuPage Co., IL | 162 | 164 | 208 | 210 | 156 | 166 | 256 | 266 | 113 | 121 | 168 | 168 |
| B 072 | DuPage Co., IL | 0   | 0   | 200 | 206 | 150 | 152 | 250 | 252 | 137 | 137 | 168 | 168 |
| B 073 | DuPage Co., IL | 174 | 176 | 210 | 216 | 164 | 164 | 264 | 264 | 107 | 129 | 168 | 168 |
| B 074 | DuPage Co., IL | 168 | 176 | 210 | 218 | 164 | 164 | 264 | 264 | 107 | 117 | 168 | 168 |
| B 075 | DuPage Co., IL | 172 | 172 | 208 | 208 | 0   | 0   | 252 | 258 | 115 | 125 | 168 | 168 |
| B 076 | Cook Co., IL   | 164 | 180 | 210 | 212 | 166 | 172 | 266 | 272 | 115 | 119 | 168 | 170 |
| B 077 | Cook Co., IL   | 162 | 178 | 208 | 210 | 154 | 166 | 254 | 266 | 113 | 127 | 168 | 168 |
| B 078 | Cook Co., IL   | 168 | 170 | 210 | 212 | 160 | 172 | 260 | 272 | 127 | 135 | 168 | 168 |
| B 079 | Cook Co., IL   | 168 | 170 | 210 | 210 | 172 | 172 | 260 | 272 | 0   | 0   | 168 | 168 |

---
